# Supplementary material for: Porphyrin(2.1.2.1) as a novel binucleating ligand: synthesis and molecular structures of mono- and di-rhodium(i) complexes
Source: Royal Society of Chemistry journal article supplement (doi:10.1039/d1cc05641g), 2021-01-01
Supplement: d1cc05641g1.pdf [file d1cc05641g1.pdf]

*Electronic Supplementary Information*

**Porphyrin(2.1.2.1) as a Novel Binucleating Ligand: Synthesis and  
Molecular Structures of Mono- and Di-rhodium(I) Complexes**

Songlin Xue,<sup>\*a,b</sup> Ningchao Liu,<sup>a</sup> Peifeng Mei,<sup>c</sup> Daiki Kuzuhara,<sup>d</sup> Mingbo Zhou,<sup>b</sup> Jianming Pan,<sup>a</sup> Hiroko Yamada,<sup>c</sup> and Fengxian Qiu<sup>\*a</sup>

<sup>a</sup>School of Chemistry and Chemical Engineering, Jiangsu University, Zhenjiang 212013, China

<sup>b</sup>Key Laboratory of the Assembly and Application of Organic Functional Molecules of Hunan Province, Changsha, Hunan 410081, China.

<sup>c</sup>Division of Materials Science, Nara Institute of Science and Technology (NAIST), 8916-5 Takayama-cho, Ikoma, Nara 630-0192, Japan

<sup>d</sup>Faculty of Science and Engineering, Iwate University, 4-3-5 Ueda, Morioka 020-8551, Japan

E-mail: slxue@ujs.edu.cn  
fxqiu@ujs.edu.cn

## **Contents**

- 1. Instrument and Materials**
- 2. X-ray Analysis**
- 3. Theoretical Calculations**
- 4. Synthesis of 1Rh and 2Rh**
- 5. Supporting Figures**
- 6. Crystal Data**
- 7. References**

### 1. Instrument and Materials.

The UV-Vis absorption spectra were measured with a JASCO UV/VIS/NIR Spectrophotometer V-670.  $^1\text{H}$  NMR spectra were recorded on a JNM-ECX 400 spectrometer using the residual solvent as the internal reference for  $^1\text{H}$  ( $\delta = 6.00$  ppm in  $\text{C}_2\text{D}_2\text{Cl}_4$ ). APCI-FT-MS mass spectrum was recorded on a ThermoFisher Scientific spectrometer. Infrared spectra were measured on KBr pellets using a FT-IR (Thermo Nicolet, NEXUS, TM) spectrometer. The cyclic voltammetry were conducted in a solution of 0.1 M TBAP<sub>6</sub> in dry- $\text{CH}_2\text{Cl}_2$  with a scan rate of  $0.1 \text{ V s}^{-1}$  in an argon-filled cell. A glassy carbon electrode and a platinum wire were used as a working and a counter electrode, respectively. A saturated Calomel electrode (SCE) was used as reference electrodes. All solvents and chemicals were reagent grade quality, obtained commercially and used without further purification except as noted.

**2. X-ray Analysis.** X-ray crystallographic data for **1Rh** (CCDC: 2103006) and **2Rh** (CCDC: 2097323) complexes were recorded at 297 K and 193 K on a Rigaku R-Axis RAPID/S using Mo-K $\alpha$  radiation from the corresponding set of confocal optics. The structures were solved by direct methods and refined on  $F^2$  by full-matrix least-squares using the CrystalClear and SHELXS-2000 program.<sup>1</sup>

**3. Theoretical Calculations.** All density functional theory calculations were achieved with the Gaussian 09 program package.<sup>2</sup> The geometry of **1Rh** and **2Rh** was optimized at the Becke's three-parameter hybrid functional combined with the Lee-Yang-Parr correlation functional abbreviated as the B3LYP level of density functional theory with the 6-31G(d)/SDD level.

#### 4. Synthesis of 1Rh and 2Rh

Porphyrin(2.1.2.1) **Por** was prepared according to our previous method.<sup>3</sup>

**1Rh. Por** (18 mg, 0.03 mmol) and NaOAc (12 mg, 0.15 mmol) were dissolved in 20 mL dry-CH<sub>2</sub>Cl<sub>2</sub> at 0°C under nitrogen, then [Rh(CO)<sub>2</sub>Cl]<sub>2</sub> (7 mg, 0.018 mmol) in 20 mL dry CH<sub>2</sub>Cl<sub>2</sub> was dropped into mixture in 1 hour. The reaction mixture was stirred for extra 2 hours at 0°C. After removal of the solvent, the crude product was purified by silica gel column chromatography (*n*-hexane/CH<sub>2</sub>Cl<sub>2</sub> = 1/3) to give **1Rh** in 55% (12 mg, 0.0165 mmol) as a brown-red solid, **2Rh** was obtained as by-product in 5 % (1.4 mg, 0.0015 mmol). <sup>1</sup>H NMR (400 MHz, C<sub>2</sub>D<sub>2</sub>Cl<sub>4</sub>, 298 K)  $\delta$  = 11.96 (brs, 1H, NH), 7.57-7.51 (m, 8H, phenyl), 7.47-7.36 (m, 8H, phenyl), 7.36-7.32 (m, 2H, phenyl), 6.54 (d, *J* = 4 Hz, 1H, pyrrole), 6.50 (d, *J* = 4 Hz, 2H, pyrrole), 6.47 (d, *J* = 4 Hz, 1H, pyrrole), 6.40 (d, *J* = 4 Hz, 2H, pyrrole), 6.32 (d, *J* = 4 Hz, 1H, pyrrole), 6.26 (d, *J* = 4 Hz, 1H, pyrrole) ppm. APCI-FT-MS: Calcd. for C<sub>44</sub>H<sub>27</sub>N<sub>4</sub>O<sub>2</sub>Rh = 746.1189 [M]<sup>+</sup>, Found: 747.12097 [M+H]<sup>+</sup>. UV-vis-NIR (in CH<sub>2</sub>Cl<sub>2</sub>)  $\lambda$  [nm] ( $\epsilon$  [M<sup>-1</sup> cm<sup>-1</sup>]): 434 (73100), 456 (78100), 497 (35800), 545 (21100). IR (KBr):  $\nu_{C=O}$  = 2064, 1996 cm<sup>-1</sup>.

**2Rh. Condition a:** **Por** (17.6 mg, 0.03 mmol), [Rh(CO)<sub>2</sub>Cl]<sub>2</sub> (58.5 mg, 0.15 mmol) and NaOAc (12 mg, 0.15 mmol) were dissolved in 20 mL dry-CH<sub>2</sub>Cl<sub>2</sub> at 45°C for 12 hours under nitrogen. After removal of the solvent, the crude product was purified by silica gel column chromatography (*n*-hexane/CH<sub>2</sub>Cl<sub>2</sub> = 2/1) to give **2Rh** in 90% (24 mg, 0.027 mmol) as a brown-red solid. **Condition b:** **Por** (17.6 mg, 0.03 mmol), [Rh(CO)<sub>2</sub>Cl]<sub>2</sub> (58.5 mg, 0.15 mmol) and NaOAc (12 mg, 0.15 mmol) were dissolved in 10 mL dry-toluene at 100°C for 12 hours under nitrogen. After removal of the solvent, the crude product was purified by silica gel column chromatography (*n*-hexane/CH<sub>2</sub>Cl<sub>2</sub> = 2/1) to give **2Rh** in 85% (23 mg, 0.026 mmol) as brown-red solid. <sup>1</sup>H NMR (400 MHz, C<sub>2</sub>D<sub>2</sub>Cl<sub>4</sub>, 298 K)  $\delta$  = 7.64-7.62 (m, 4H, phenyl), 7.49-7.47 (m, 4H, phenyl), 7.43-7.39 (m, 8H, phenyl), 7.20 (brs, 2H, phenyl), 6.32 (d, *J* = 4 Hz, 4H, pyrrole), 6.04 (d, *J* = 4 Hz, 4H, pyrrole) ppm. APCI-FT-MS: Calcd. for C<sub>46</sub>H<sub>26</sub>N<sub>4</sub>O<sub>4</sub>Rh<sub>2</sub> = 904.0064 [M]<sup>+</sup>, Found: 905.01025 [M+H]<sup>+</sup>. UV-vis-NIR (in CH<sub>2</sub>Cl<sub>2</sub>)  $\lambda$  [nm] ( $\epsilon$  [M<sup>-1</sup> cm<sup>-1</sup>]): 333 (28100), 393 (23300), 496 (106000). IR (KBr):  $\nu_{C=O}$  = 2071, 2002 cm<sup>-1</sup>.

## 5. Supporting Figures

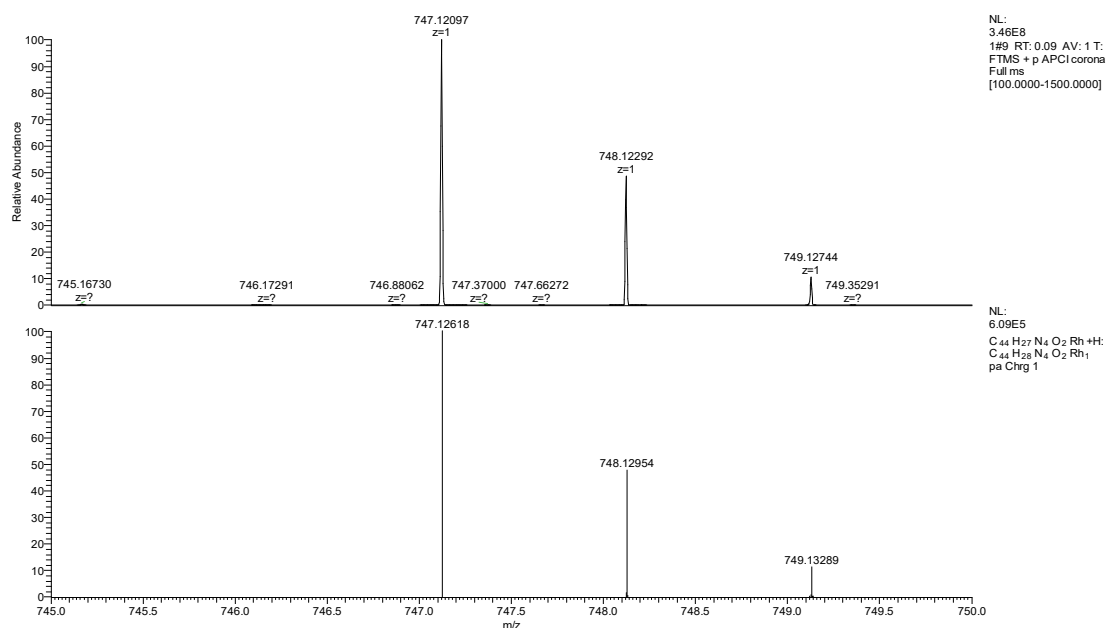

**Fig. S1** Observed (top) and simulated (bottom) APCI-FT-MS spectrum of **1Rh**.

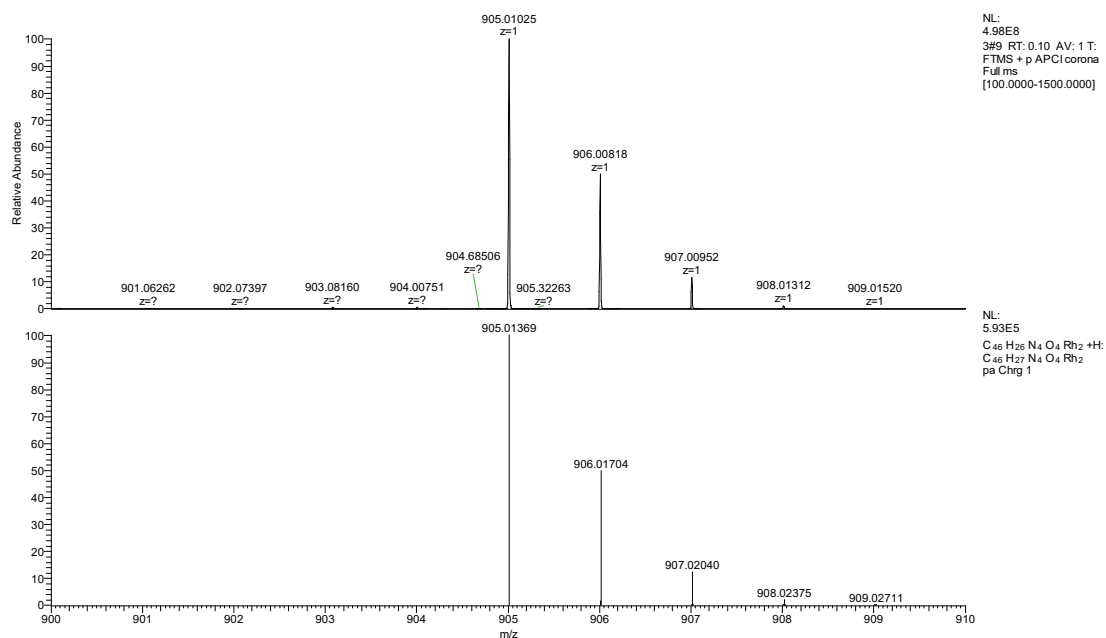

**Fig. S2** Observed (top) and simulated (bottom) APCI-FT-MS spectrum of **2Rh**.

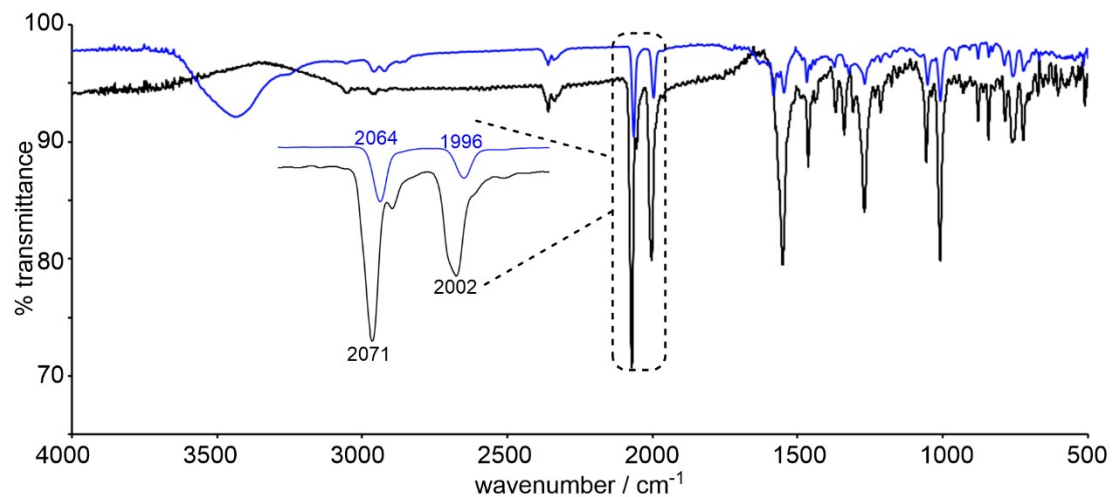

**Fig. S3** IR spectra of **1Rh** (blue line) and **2Rh** (black line).

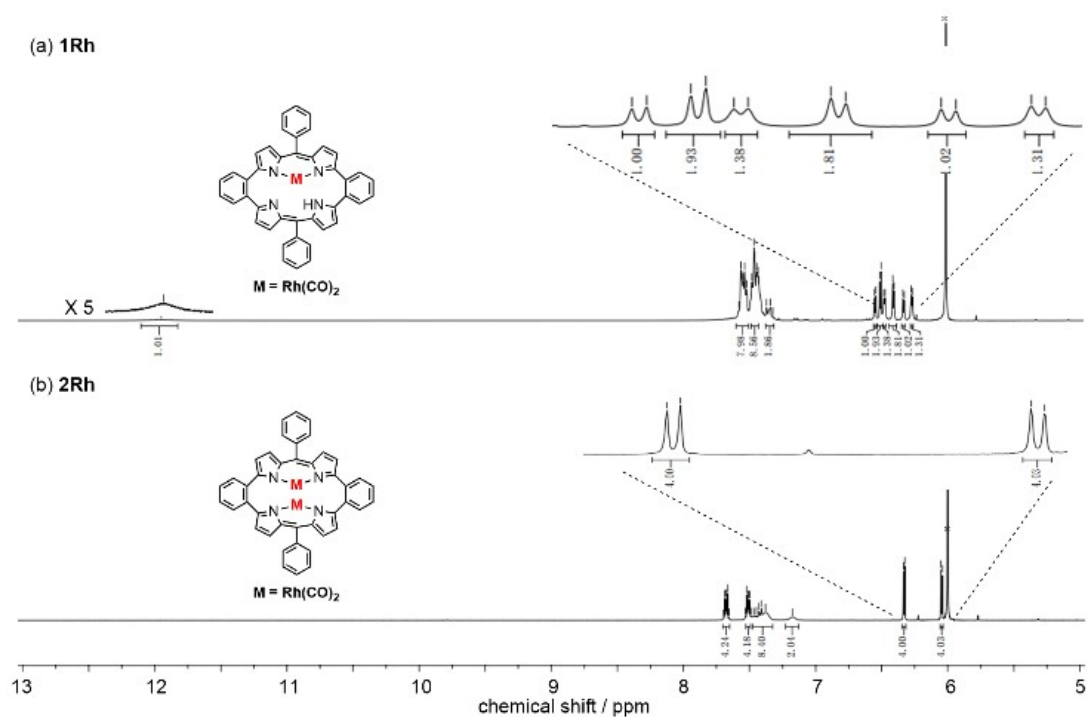

**Fig. S4**  $^1\text{H}$  NMR spectra of (a) **1Rh** and (b) **2Rh** in  $\text{C}_2\text{D}_2\text{Cl}_4$  at 293 K. The asterisks indicate residual solvent peaks.

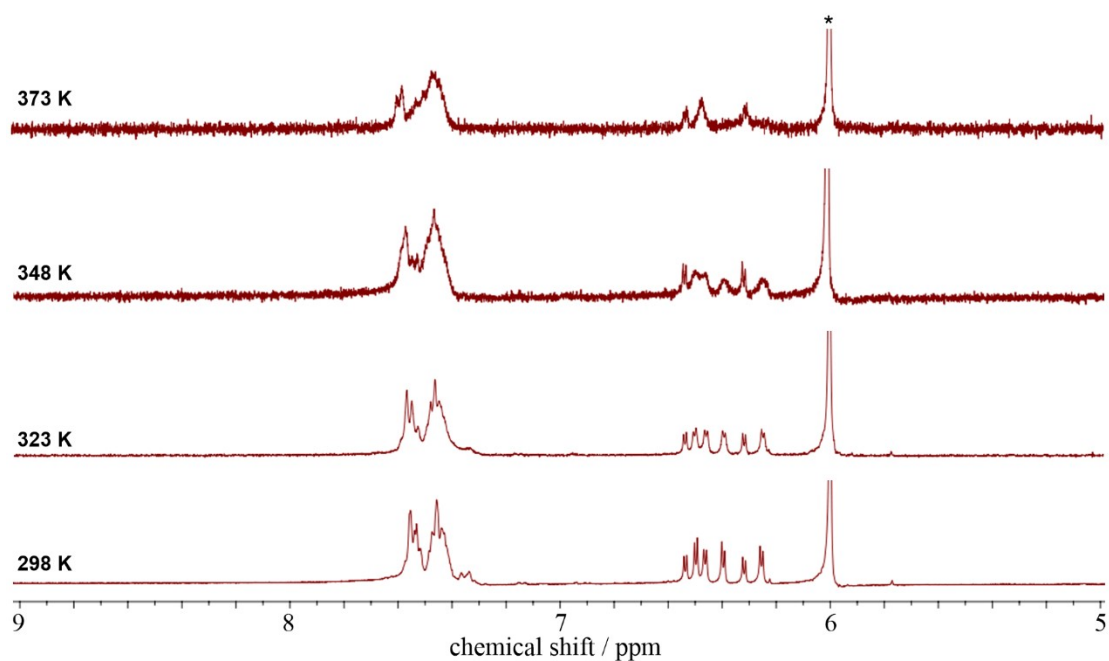

**Fig. S5** Variable temperature  $^1\text{H}$  NMR spectra of **1Rh** in  $\text{C}_2\text{D}_2\text{Cl}_4$ . The asterisks indicate residual solvent peaks.

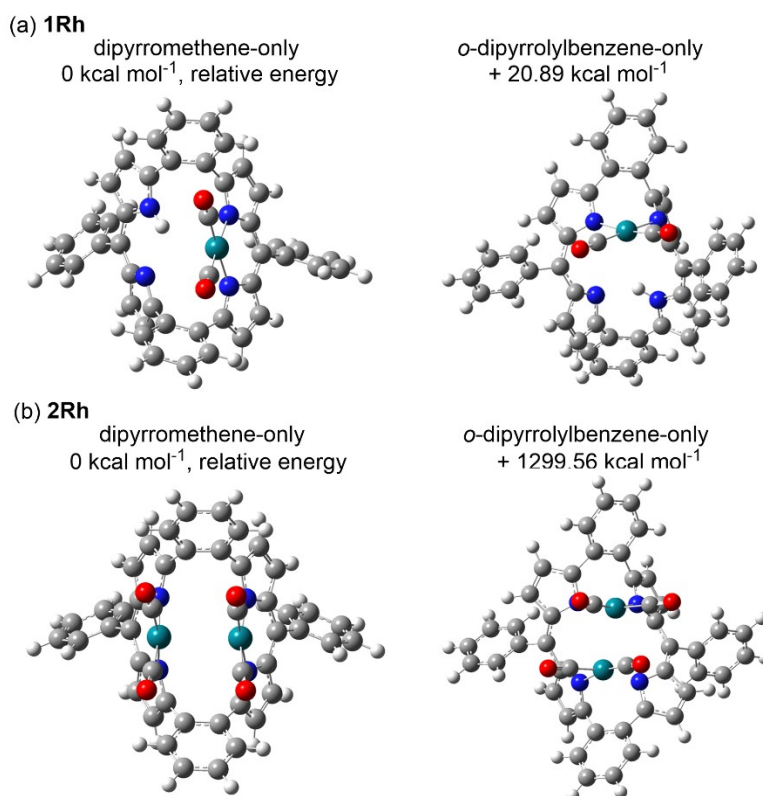

**Fig. S6** Optimized structures and relative energies of (a) **1Rh** and (b) **2Rh** for dipyrromethene-only (0 kcal mol<sup>-1</sup>, relative energy), and *o*-dipyrrolylbenzene-only coordination modes.

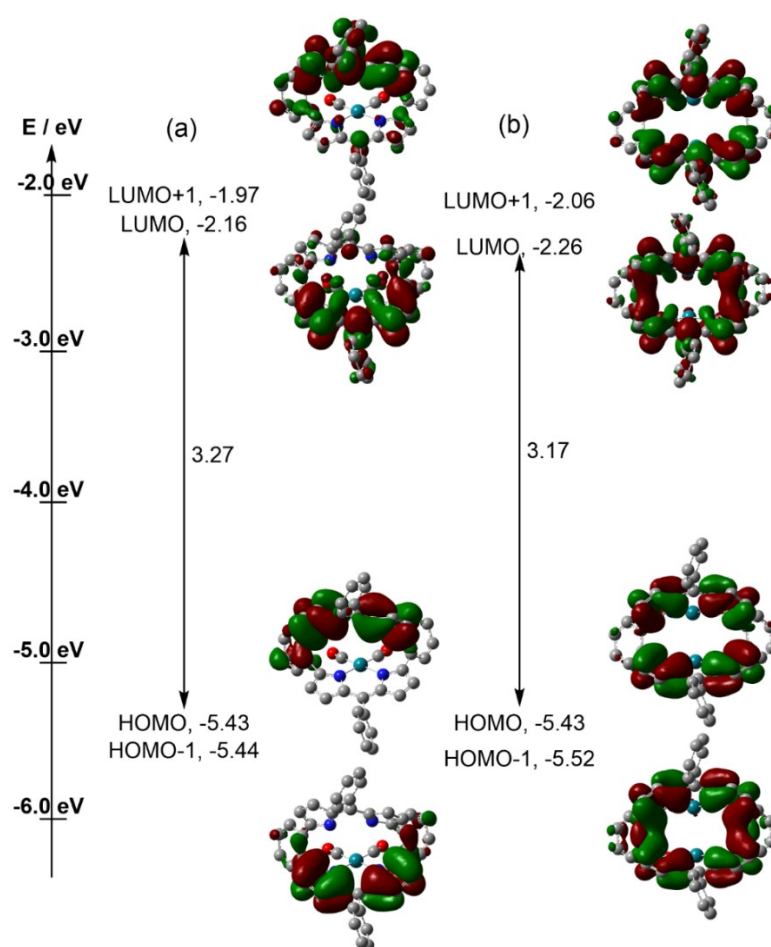

**Fig. S7** Frontier molecular orbitals and energy diagrams of (a) **1Rh** and (b) **2Rh** calculated at the B3LYP/6-31G(d)/SDD level of theory.



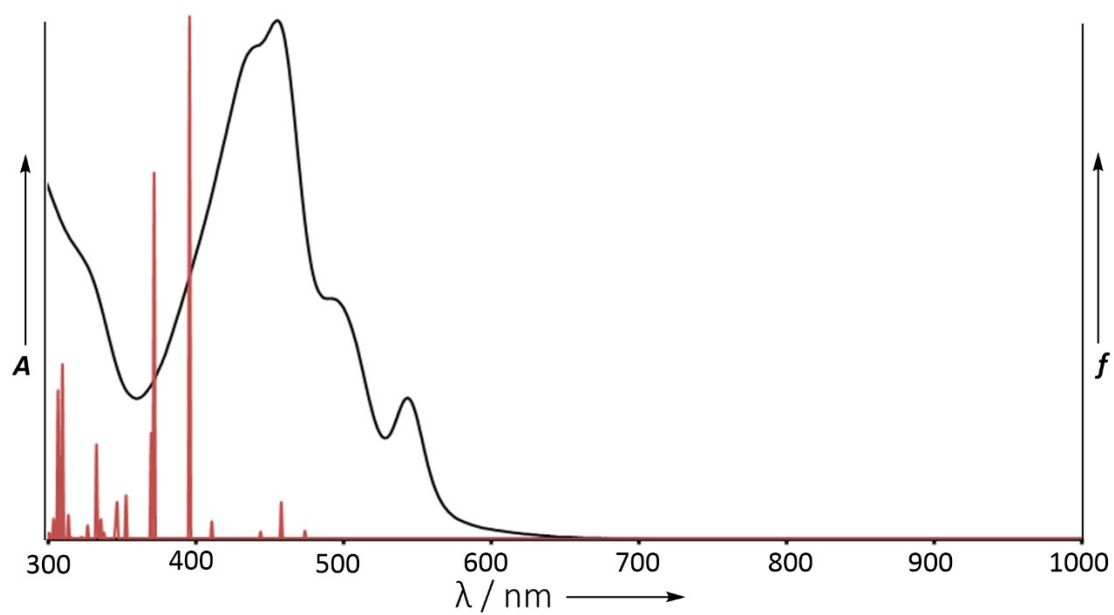

**Fig. S8** The UV-Vis absorption spectrum (black line, left axis) and oscillator strengths (red bar, right axis), which is calculated at the B3LYP/6-31G(d)/SDD level of theory of **1Rh**.

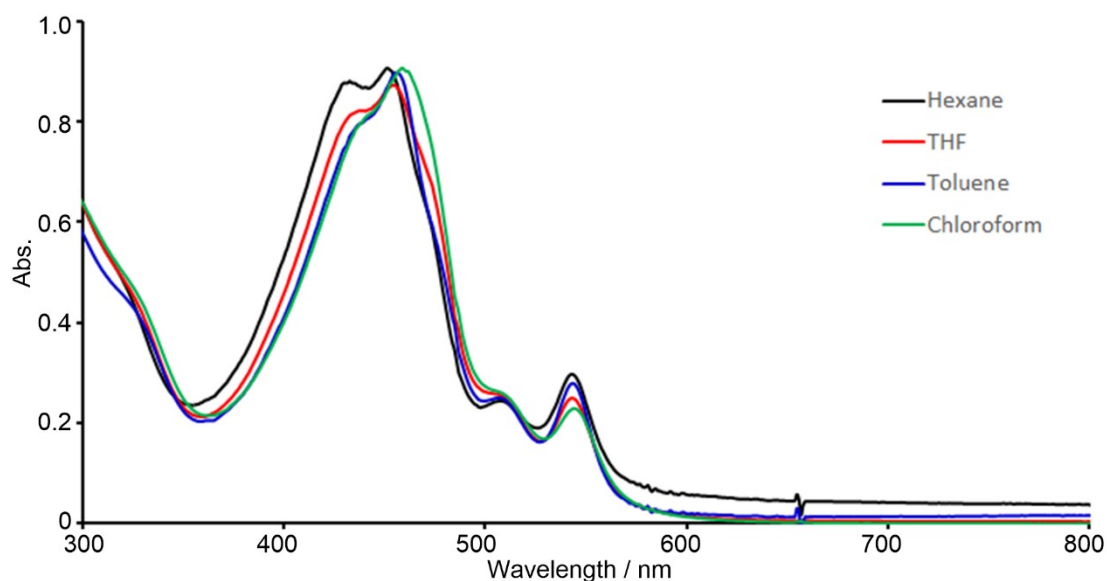

**Fig. S9** UV-Vis absorption spectra of **1Rh** in hexane (black line), toluene (blue line), chloroform (green line) and THF (red line).

**Table S1.** Major composition, vertical excitation energies ( $E$ , eV/nm) and oscillator strengths ( $f$ ) for the lowest optically allowed excited states of **1Rh**, calculated at the B3LYP/6-31G(d)/SDD level of theory.

| State | Composition                              | Exci.    | $f$    |
|-------|------------------------------------------|----------|--------|
| 1     | H* -> L                                  | 2.61/474 | 0.0063 |
| 2     | H-1 -> L (0.58416)<br>H -> L+1 (0.33884) | 2.71/458 | 0.0278 |

\*H = HOMO, Highest Occupied Molecular Orbital, L = LUMO, Lowest Unoccupied Molecular Orbital.

## 6. Crystal Data

**Table S2.** Crystal data of **1Rh**

|                                        |                                                                                                                            |
|----------------------------------------|----------------------------------------------------------------------------------------------------------------------------|
| Empirical formula                      | $C_{44}H_{27}N_4O_2Rh$                                                                                                     |
| Formula weight                         | 746.60                                                                                                                     |
| Temperature                            | 193.0 K                                                                                                                    |
| Wavelength                             | 1.34139 Å                                                                                                                  |
| Crystal system                         | Orthorhombic                                                                                                               |
| Space group                            | $Pna2_1$                                                                                                                   |
| Unit cell dimensions                   | $a = 22.1380(15)$ Å $\alpha = 90^\circ$<br>$b = 6.6176(4)$ Å $\beta = 90^\circ$<br>$c = 22.4596(11)$ Å $\gamma = 90^\circ$ |
| Volume                                 | $3290.3(3)$ Å <sup>3</sup>                                                                                                 |
| Z                                      | 4                                                                                                                          |
| Density (calculated)                   | $1.507$ Mg/m <sup>3</sup>                                                                                                  |
| Absorption coefficient                 | $3.037$ mm <sup>-1</sup>                                                                                                   |
| $F(000)$                               | 1520                                                                                                                       |
| Crystal size                           | $0.08 \times 0.06 \times 0.05$ mm <sup>3</sup>                                                                             |
| Theta range for data collection        | $3.474$ to $55.295^\circ$ .                                                                                                |
| Index ranges                           | $-26 \leq h \leq 26$ , $-8 \leq k \leq 8$ , $-27 \leq l \leq 21$                                                           |
| Reflections collected                  | 31791                                                                                                                      |
| Independent reflections                | 5774 [ $R(\text{int}) = 0.1693$ ]                                                                                          |
| Completeness to theta = $53.594^\circ$ | 99.2 %                                                                                                                     |
| Absorption correction                  | Semi-empirical from equivalents                                                                                            |
| Max. and min. transmission             | 0.7508 and 0.5473                                                                                                          |
| Refinement method                      | Full-matrix least-squares on $F^2$                                                                                         |
| Data / restraints / parameters         | 5774 / 50 / 465                                                                                                            |
| Goodness-of-fit on $F^2$               | 1.014                                                                                                                      |
| Final $R$ indices [ $I > 2\sigma(I)$ ] | $R_1 = 0.0977$ , $wR_2 = 0.2401$                                                                                           |
| $R$ indices (all data)                 | $R_1 = 0.1693$ , $wR_2 = 0.2850$                                                                                           |
| Absolute structure parameter           | 0.24(4)                                                                                                                    |
| Extinction coefficient                 | n/a                                                                                                                        |
| Largest diff. peak and hole            | $1.877$ and $-0.687$ e.Å <sup>-3</sup>                                                                                     |

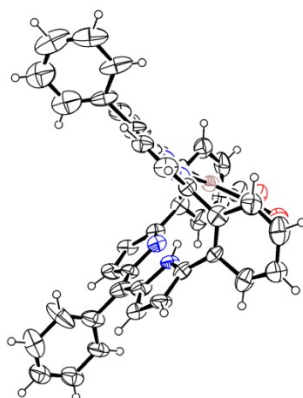

**Fig.S10** Crystal structure of **1Rh**. The thermal ellipsoids represent for 40% probability.

**Table S3.** Crystal data of **2Rh**

|                                         |                                                              |                            |
|-----------------------------------------|--------------------------------------------------------------|----------------------------|
| Empirical formula                       | $\text{C}_{46}\text{H}_{26}\text{N}_4\text{O}_4\text{Rh}_2$  |                            |
| Formula weight                          | 904.53                                                       |                            |
| Temperature                             | 296.15 K                                                     |                            |
| Wavelength                              | 0.71073 Å                                                    |                            |
| Crystal system                          | Triclinic                                                    |                            |
| Space group                             | $P\bar{1}$                                                   |                            |
| Unit cell dimensions                    | $a = 13.6924(12)$ Å                                          | $\alpha = 90.341(2)^\circ$ |
|                                         | $b = 18.0240(17)$ Å                                          | $\beta = 104.620(2)^\circ$ |
|                                         | $c = 26.204(2)$ Å                                            | $\gamma = 98.347(2)^\circ$ |
| Volume                                  | 6185.2(10) Å <sup>3</sup>                                    |                            |
| Z                                       | 6                                                            |                            |
| Density (calculated)                    | 1.457 Mg/m <sup>3</sup>                                      |                            |
| Absorption coefficient                  | 0.847 mm <sup>-1</sup>                                       |                            |
| $F(000)$                                | 2712                                                         |                            |
| Crystal size                            | 0.09 x 0.08 x 0.01 mm <sup>3</sup>                           |                            |
| Theta range for data collection         | 1.555 to 28.130°.                                            |                            |
| Index ranges                            | $-18 \leq h \leq 18, -22 \leq k \leq 23, -34 \leq l \leq 31$ |                            |
| Reflections collected                   | 53450                                                        |                            |
| Independent reflections                 | 30021 [ $R(\text{int}) = 0.0415$ ]                           |                            |
| Completeness to $\theta = 25.242^\circ$ | 99.9 %                                                       |                            |
| Absorption correction                   | Semi-empirical from equivalents                              |                            |
| Max. and min. transmission              | 0.7457 and 0.6354                                            |                            |
| Refinement method                       | Full-matrix least-squares on $F^2$                           |                            |
| Data / restraints / parameters          | 30021 / 0 / 1513                                             |                            |
| Goodness-of-fit on $F^2$                | 0.917                                                        |                            |
| Final R indices [ $I > 2\sigma(I)$ ]    | $R_1 = 0.0495, wR_2 = 0.1034$                                |                            |
| R indices (all data)                    | $R_1 = 0.1087, wR_2 = 0.1266$                                |                            |
| Extinction coefficient                  | n/a                                                          |                            |
| Largest diff. peak and hole             | 0.846 and -0.787 e.Å <sup>-3</sup>                           |                            |

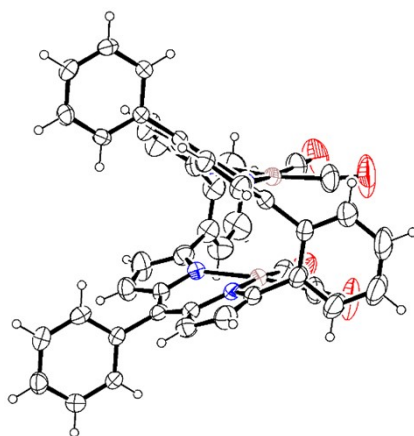**Fig. S11** Crystal structure of **2Rh**. The thermal ellipsoids represent for 40% probability.

## 7. References

- (1) G. Sheldrick, *Acta Cryst.* **2008**, *A64*, 112.
- (2) Gaussian 09, Revision B.01, M. J. Frisch, G. W. Trucks, H. B. Schlegel, G. E. Scuseria, M. A. Robb, J. R. Cheeseman, G. Scalmani, V. Barone, B. Mennucci, G. A. Petersson, H. Nakatsuji, M. Caricato, X. Li, H. P. Hratchian, A. F. Izmaylov, J. Bloino, G. Zheng, J. L. Sonnenberg, M. Hada, M. Ehara, K. Toyota, R. Fukuda, J. Hasegawa, M. Ishida, T. Nakajima, Y. Honda, O. Kitao, H. Nakai, T. Vreven, J. A. Montgomery, Jr., J. E. Peralta, F. Ogliaro, M. Bearpark, J. J. Heyd, E. Brothers, K. N. Kudin, V. N. Staroverov, T. Keith, R. Kobayashi, J. Normand, K. Raghavachari, A. Rendell, J. C. Burant, S. S. Iyengar, J. Tomasi, M. Cossi, N. Rega, J. M. Millam, M. Klene, J. E. Knox, J. B. Cross, V. Bakken, C. Adamo, J. Jaramillo, R. Gomperts, R. E. Stratmann, O. Yazyev, A. J. Austin, R. Cammi, C. Pomelli, J. W. Ochterski, R. L. Martin, K. Morokuma, V. G. Zakrzewski, G. A. Voth, P. Salvador, J. J. Dannenberg, S. Dapprich, A. D. Daniels, O. Farkas, J. B. Foresman, J. V. Ortiz, J. Cioslowski, and D. J. Fox, Gaussian, Inc., Wallingford CT, 2010.
- (3) (a) S. Xue, D. Kuzuhara, N. Aratani, H. Yamada, *Org. Lett.* **2019**, *21*, 2069; (b) D. Kuzuhara, W. Furukawa, A. Kitashiro, N. Aratani, H. Yamada, *Chem. - Eur. J.* **2016**, *22*, 10671.
